# Supplementary material for: Contrasted Patterns of Selection on MHC-Linked Microsatellites in Natural Populations of the Malagasy Plague Reservoir
Source: PubMed Central journal article supplement (PMC3293896; doi:10.1371/journal.pone.0032814), 2012-03-05

**TNF / AAM-ALA**

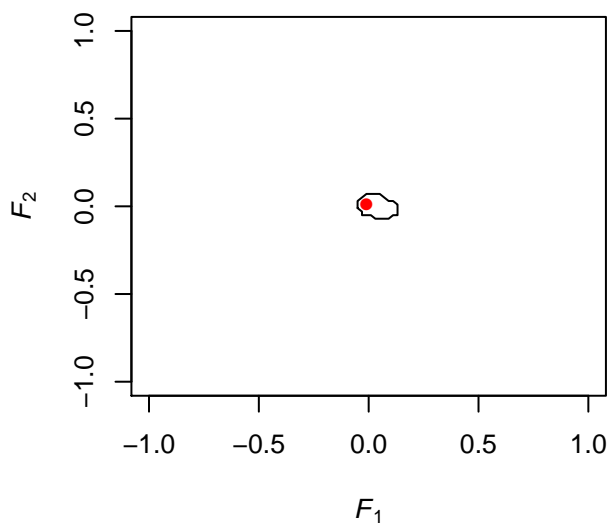

**TNF / AIT-TSO**

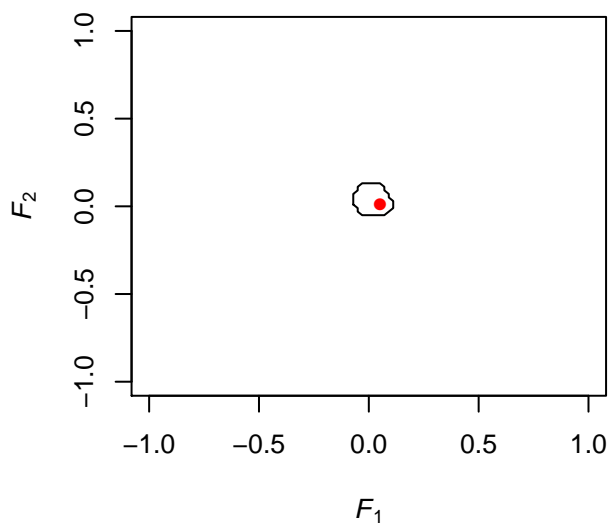

**TNF / FIR-MAE**

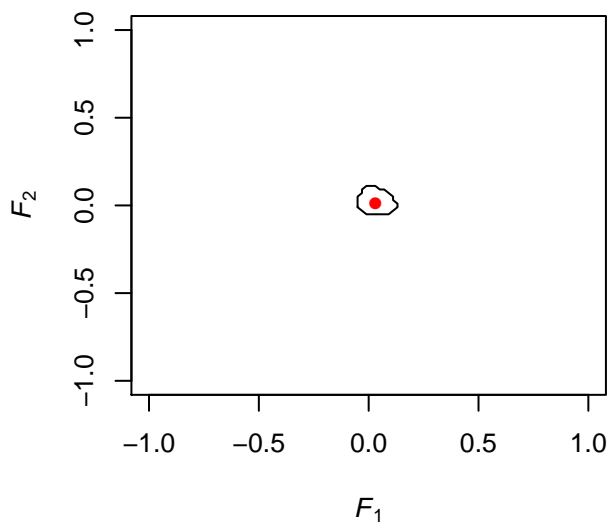

**TNF / MAtO-VEL**

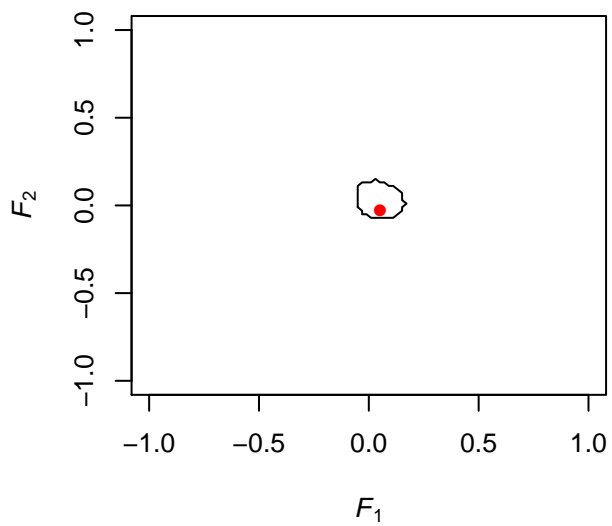

Supplement: pone.0032814.s002.pdf [file pone.0032814.s002.pdf]
