# Supplementary material for: Contrasted Patterns of Selection on MHC-Linked Microsatellites in Natural Populations of the Malagasy Plague Reservoir
Source: PubMed Central journal article supplement (PMC3293896; doi:10.1371/journal.pone.0032814), 2012-03-05

**D20lmg2 / AAM-ALA**

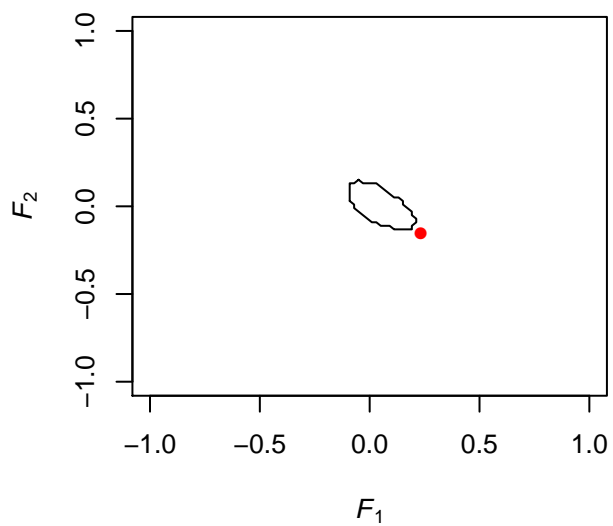

**D20lmg2 / AIT-TSO**

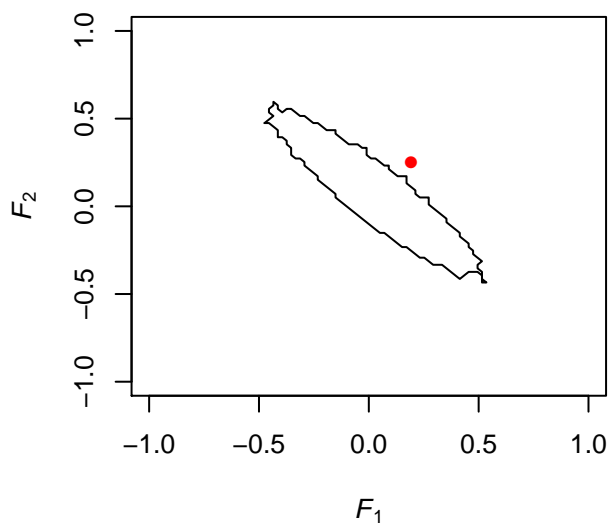

**D20lmg2 / FIR-MAE**

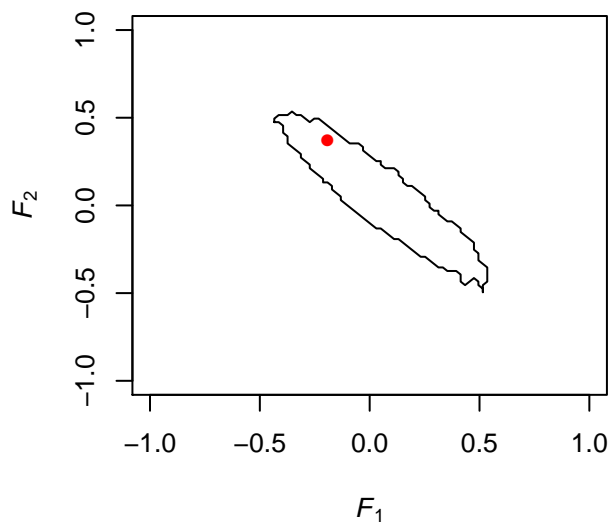

**D20lmg2 / MAto-VEL**

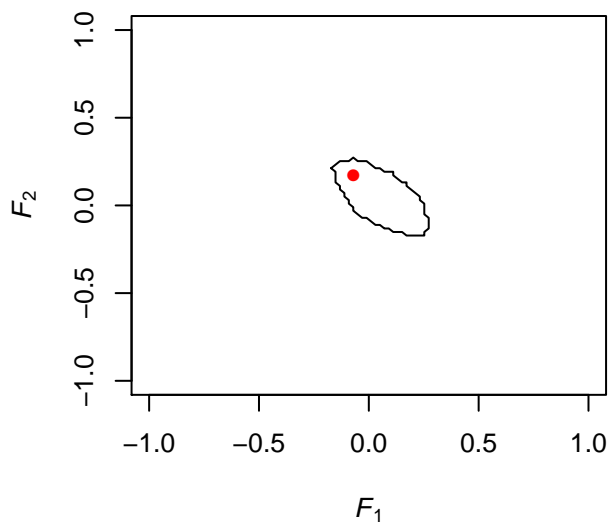

Supplement: pone.0032814.s003.pdf [file pone.0032814.s003.pdf]
