# Supplementary material for: Contrasted Patterns of Selection on MHC-Linked Microsatellites in Natural Populations of the Malagasy Plague Reservoir
Source: PubMed Central journal article supplement (PMC3293896; doi:10.1371/journal.pone.0032814), 2012-03-05
Supplement: pone.0032814.s004.pdf [file pone.0032814.s004.pdf]

| Population               |       | Presumed neutral microsatellites |                  |                  |                 |                  |                  |                  |                  |                  |                  |                  |                  | MHC-linked loci  |                 |                  |
|--------------------------|-------|----------------------------------|------------------|------------------|-----------------|------------------|------------------|------------------|------------------|------------------|------------------|------------------|------------------|------------------|-----------------|------------------|
|                          |       | Rr014                            | Rr017            | Rr022            | Rr054           | Rr067            | Rr068            | Rr093            | Rr107            | Rr114            | D10R20           | D11R56           | D7R13            | D11M5            | D20Img2         | TNF              |
| Madagascar dataset       | AAM   | 0,013                            | 0,066            | 0,000            | 0,026           | 0,148            | 0,000            | 0,016            | 0,000            | 0,000            | 0,026            | 0,000            | 0,043            | 0,000            | 0,177           | 0,058            |
|                          | ALA   | 0,000                            | 0,000            | 0,000            | 0,000           | 0,000            | 0,000            | 0,044            | 0,000            | 0,036            | 0,099            | 0,027            | 0,000            | 0,006            | 0,025           | 0,000            |
|                          | AIT   | 0,000                            | 0,000            | 0,020            | 0,000           | 0,020            | 0,000            | 0,089            | 0,000            | 0,102            | 0,041            | 0,000            | 0,000            | 0,073            | 0,000           | 0,000            |
|                          | TSO   | 0,000                            | 0,101            | 0,000            | 0,000           | 0,143            | 0,000            | 0,000            | 0,019            | 0,000            | 0,106            | 0,205            | 0,121            | 0,121            | 0,000           | 0,000            |
|                          | FIR   | 0,000                            | 0,084            | 0,000            | 0,000           | 0,124            | 0,000            | 0,000            | 0,036            | 0,003            | 0,000            | 0,000            | 0,000            | 0,000            | 0,000           | 0,071            |
|                          | MAE   | 0,015                            | 0,000            | 0,000            | 0,000           | 0,000            | 0,000            | 0,000            | 0,000            | 0,000            | 0,068            | 0,000            | 0,010            | 0,000            | 0,000           | 0,013            |
|                          | MAtO  | 0,000                            | 0,000            | 0,036            | 0,007           | 0,093            | 0,000            | 0,000            | 0,000            | 0,000            | 0,000            | 0,000            | 0,021            | 0,000            | 0,079           | 0,023            |
|                          | VEL   | 0,000                            | 0,000            | 0,041            | 0,000           | 0,104            | 0,000            | 0,000            | 0,000            | 0,000            | 0,000            | 0,145            | 0,000            | 0,000            | 0,000           | 0,000            |
| Betafo dataset           | ApgE  | 0,000                            | 0,099            | 0,000            | 0,000           | 0,000            | 0,033            | 0,000            | 0,000            | 0,000            | 0,032            | 0,059            | 0,044            | 0,109            | 0,000           | 0,000            |
|                          | ApgM  | 0,044                            | 0,000            | 0,057            | 0,000           | 0,001            | 0,079            | 0,000            | 0,011            | 0,105            | 0,148            | 0,000            | 0,000            | 0,114            | 0,087           | 0,065            |
|                          | AlnE  | 0,000                            | 0,000            | 0,000            | 0,000           | 0,046            | 0,000            | 0,000            | 0,000            | 0,067            | 0,000            | 0,045            | 0,000            | 0,000            | 0,072           | 0,000            |
|                          | AlnM  | 0,000                            | 0,000            | 0,000            | 0,000           | 0,072            | 0,000            | 0,000            | 0,051            | 0,000            | 0,095            | 0,035            | 0,000            | 0,017            | 0,084           | 0,000            |
|                          | AtnE  | 0,046                            | 0,000            | 0,047            | 0,008           | 0,000            | 0,000            | 0,000            | 0,014            | 0,000            | 0,247            | 0,000            | 0,000            | 0,024            | 0,000           | 0,026            |
|                          | AhyM  | 0,053                            | 0,038            | 0,038            | 0,134           | 0,151            | 0,000            | 0,191            | 0,000            | 0,007            | 0,000            | 0,098            | 0,000            | 0,010            | 0,015           | 0,041            |
|                          | VniE  | 0,000                            | 0,000            | 0,000            | 0,000           | 0,000            | 0,000            | 0,000            | 0,000            | 0,000            | 0,000            | 0,202            | 0,000            | 0,009            | 0,000           | 0,000            |
|                          | VniM  | 0,013                            | 0,009            | 0,079            | 0,000           | 0,094            | 0,046            | 0,076            | 0,068            | 0,092            | 0,000            | 0,000            | 0,000            | 0,000            | 0,000           | 0,000            |
|                          | MkfE  | 0,016                            | 0,125            | 0,000            | 0,000           | 0,000            | 0,000            | 0,009            | 0,000            | 0,112            | 0,000            | 0,000            | 0,133            | 0,012            | 0,044           | 0,000            |
|                          | MkfM  | 0,029                            | 0,046            | 0,002            | 0,000           | 0,000            | 0,194            | 0,000            | 0,045            | 0,000            | 0,000            | 0,067            | 0,000            | 0,080            | 0,036           | 0,031            |
|                          | AkIE  | 0,000                            | 0,015            | 0,000            | 0,000           | 0,000            | 0,024            | 0,000            | 0,000            | 0,094            | 0,000            | 0,000            | 0,000            | 0,000            | 0,127           | 0,000            |
| AkIM                     | 0,000 | 0,063                            | 0,000            | 0,000            | 0,000           | 0,000            | 0,059            | 0,000            | 0,169            | 0,000            | 0,000            | 0,000            | 0,000            | 0,035            | 0,185           |                  |
| Mean over 20 populations |       | 0,011<br>± 0,018                 | 0,032<br>± 0,042 | 0,016<br>± 0,024 | 0,009<br>± 0,03 | 0,050<br>± 0,059 | 0,019<br>± 0,046 | 0,024<br>± 0,048 | 0,012<br>± 0,021 | 0,039<br>± 0,054 | 0,043<br>± 0,066 | 0,044<br>± 0,067 | 0,019<br>± 0,039 | 0,029<br>± 0,043 | 0,039<br>± 0,05 | 0,026<br>± 0,044 |
